# Supplementary material
Source: PubMed Central journal article supplement (PMC4658644)
Supplement: 97320630011460S1.pdf [file 97320630011460S1.pdf]

## Supplementary material:

**Table I:** List of the potential MHC-I and MHC-II FAdV immunogenic peptides for the chicken immune system, predicted by the immunoinformatics approach described in this study

| Nº | Peptide Sequences | Bind Level | MHC | Nº | Peptide Sequences | Bind Level | MHC |
|----|-------------------|------------|-----|----|-------------------|------------|-----|
| 1  | TELSYQYML         | SB         | I   | 1  | SEAAKAAAA         | WB         | I   |
| 2  | KESLSRFVV         | SB         | I   | 2  | IEMTYEEAT         | WB         | I   |
| 3  | IEYHLTLAI         | SB         | I   | 3  | SESPDAFPA         | WB         | I   |
| 4  | TEYLGAVAV         | SB         | I   | 4  | QESLFKYLM         | WB         | I   |
| 5  | SELELMAEL         | SB         | I   | 5  | MEAPLLPPI         | WB         | I   |
| 6  | MEWCMDTAL         | SB         | I   | 6  | QEFVFPYPRF        | WB         | I   |
| 7  | REHLASVPI         | SB         | I   | 7  | TELGWIVKL         | WB         | I   |
| 8  | FEFQHEDSI         | SB         | I   | 8  | SETAPGQNV         | WB         | I   |
| 9  | RELNLCLPA         | SB         | I   | 9  | AEREASDTA         | WB         | I   |
| 10 | LEFINGRAL         | SB         | I   | 10 | GENSLTSGL         | WB         | I   |
| 11 | RENWFYQLL         | SB         | I   | 11 | TEISLKMVL         | WB         | I   |
| 12 | AEISPITPL         | SB         | I   | 12 | SELEYGGPS         | WB         | I   |
| 13 | SELAFHLQL         | SB         | I   | 13 | LELMLRNAT         | WB         | I   |
| 14 | HEREYVLSV         | SB         | I   | 14 | AELADSDVL         | WB         | I   |
|    |                   |            |     | 15 | KEYCEVLYL         | WB         | I   |

**Table 2:** Antibody titers estimated as optical density (OD) elicited in the control and vaccinated groups.

|                    |          | MHC-II multi epitopic protein |                  | P-value |
|--------------------|----------|-------------------------------|------------------|---------|
|                    |          | Control                       |                  |         |
| OD Mean<br>(OD SD) | 2nd Week | 0.252<br>(0.124)              | 0.324<br>(0.222) | 0.381   |
|                    | 3rd Week | 0.237<br>(0.118)              | 0.404<br>(0.271) | 0.050   |
|                    | 4th Week | 0.258<br>(0.141)              | 1.728<br>(1.569) | 0.024   |

A greater difference in the optical density (proportional to antibody titer) is observed at the third and fourth week in comparison with the control group.
